# Supplementary material for: A tunable solid-state fluorescence system consisting of organic salts of anthracene-2,6-disulfonic acid with primary amines
Source: Royal Society of Chemistry journal article supplement (doi:10.1039/b418241c), 2005-01-01
Supplement: b418241c.pdf [file b418241c.pdf]

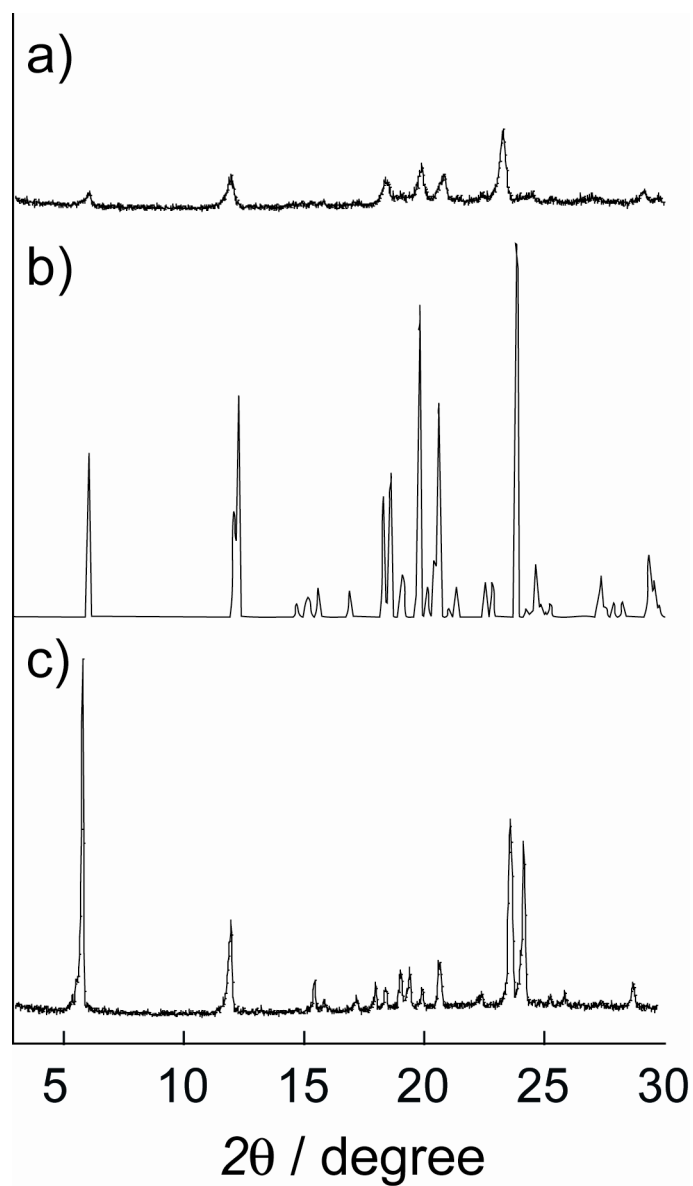

Figure S1. Powder X-ray diffraction profiles of a) **5** (crystal),  
b) **5** (simulated by TEXSAN) and c) **4** (crystal).

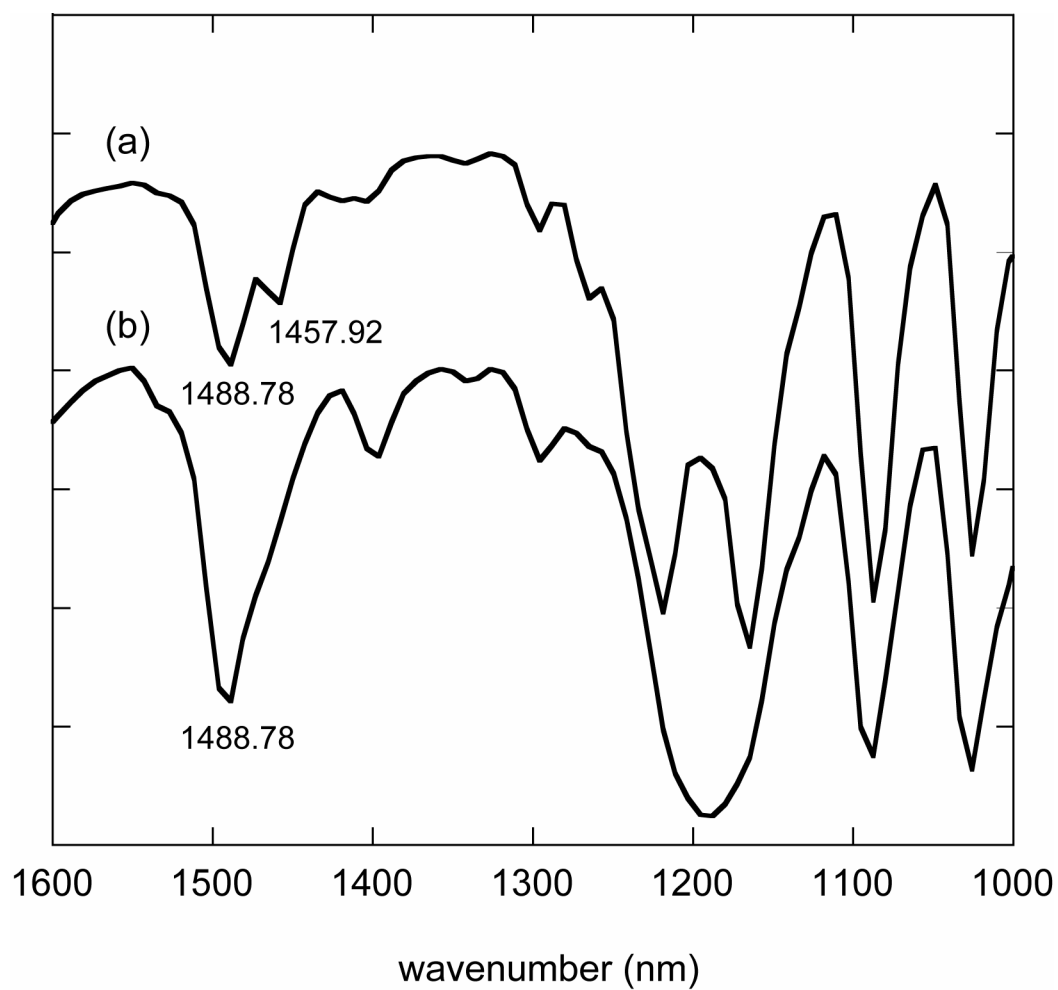

Figure S2. FT-IR spectrum of (a) Form I, **1** and (b) Form II, **4** in KBr
